# Supplementary material for: PrimeDesign software for rapid and simplified design of prime editing guide RNAs
Source: PubMed Central journal article supplement (PMC7884779; doi:10.1038/s41467-021-21337-7), 2021-02-15
Supplement: 41467_2021_21337_MOESM4_ESM.pdf [file 41467_2021_21337_MOESM4_ESM.pdf]

**Title:** Supplementary Data 1:

**Description:** PrimeDesign analysis of ClinVar variants

**Title:** Supplementary Data 2:

**Description:** Sequences of pegRNAs, nicking sgRNAs, primers, and amplicons used
